# Supplementary material for: Thermal dehydrochlorination in the 4-fluoroaniline–trichloroborane system: identification of reactive intermediates involved in the formation of B,B′,B′′-trichloro-N,N′,N′′-tri((4-fluoro)phenyl)borazine
Source: Royal Society of Chemistry journal article supplement (doi:10.1039/c8dt03954b), 2018-01-01
Supplement: c8dt03954b1.pdf [file c8dt03954b1.pdf]

## Electronic Supporting Information

Thermal dehydrochlorination in the 4-fluoroaniline–trichloroborane system: Identification of reactive intermediates involved in the formation of *B,B',B''*-trichloro-*N,N',N''*-tri((4-fluoro)phenyl)borazine

Jennifer Hahn,<sup>a</sup> Matthias Krieg,<sup>a</sup> Cäcilia Maichle-Mössmer,<sup>b</sup> Reinhold F. Fink,<sup>c</sup> and Holger F.

Bettinger<sup>a</sup>

<sup>a</sup> *Institut für Organische Chemie, Universität Tübingen, Auf der Morgenstelle 18, 72076 Tübingen, Germany*

<sup>b</sup> *Institut für Anorganische Chemie, Universität Tübingen, Auf der Morgenstelle 18, 72076 Tübingen, Germany*

<sup>c</sup> *Institut für Physikalische und Theoretische Chemie, Universität Tübingen, Auf der Morgenstelle 18, 72076 Tübingen, Germany*

### Contents

|                                                      |     |
|------------------------------------------------------|-----|
| I. Concentration dependence measured in experiment 1 | S2  |
| II. Spectra (NMR, IR, and MS) of compounds           |     |
| • <b>1a</b>                                          | S3  |
| • <b>2a</b>                                          | S5  |
| • <b>3a</b>                                          | S6  |
| • <b>4a</b>                                          | S10 |
| • <b>5a</b>                                          | S13 |
| III. Computational Supplementary Information         | S15 |

## I. Concentration dependence measured in experiment 1.

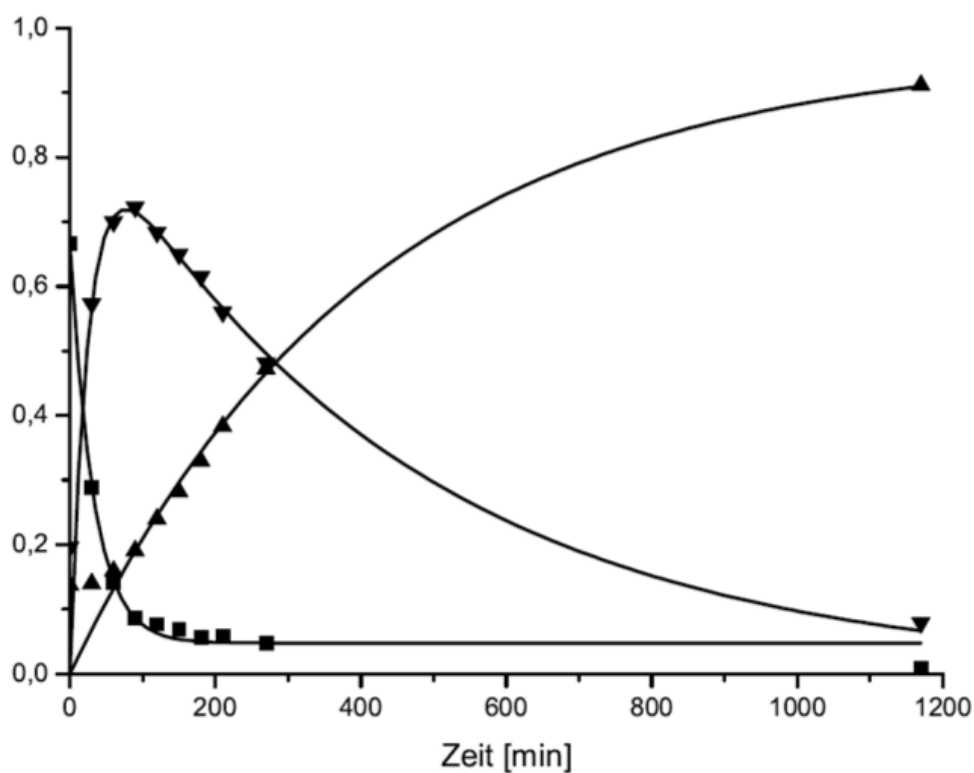

**Figure S1.** Data obtained by  $^{19}\text{F}$  NMR (experiment 1) in rel. intensities using signals at -112.0 ppm (**1a**, square), -117.2 ppm (**2a**, triangle up) and -115.5 (**3a**, triangle down).

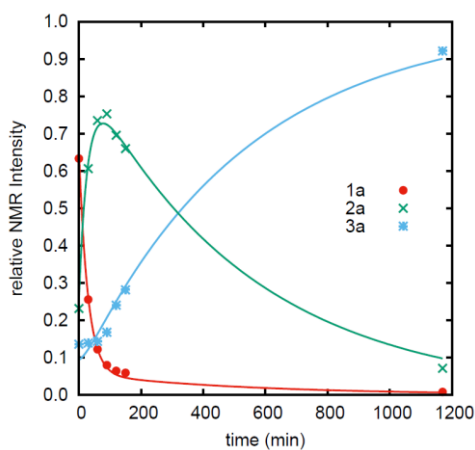

**Figure S2.** Data obtained by  $^{11}\text{B}\{^1\text{H}\}$  NMR (experiment 1) in relative intensities using the signals at 6.6 ppm (**1a**, red), 32 ppm (small  $h_{1/2}$ ; **2a**, green) and 32.0 ppm (large  $h_{1/2}$ ; **3a**, blue).

## II. Spectra

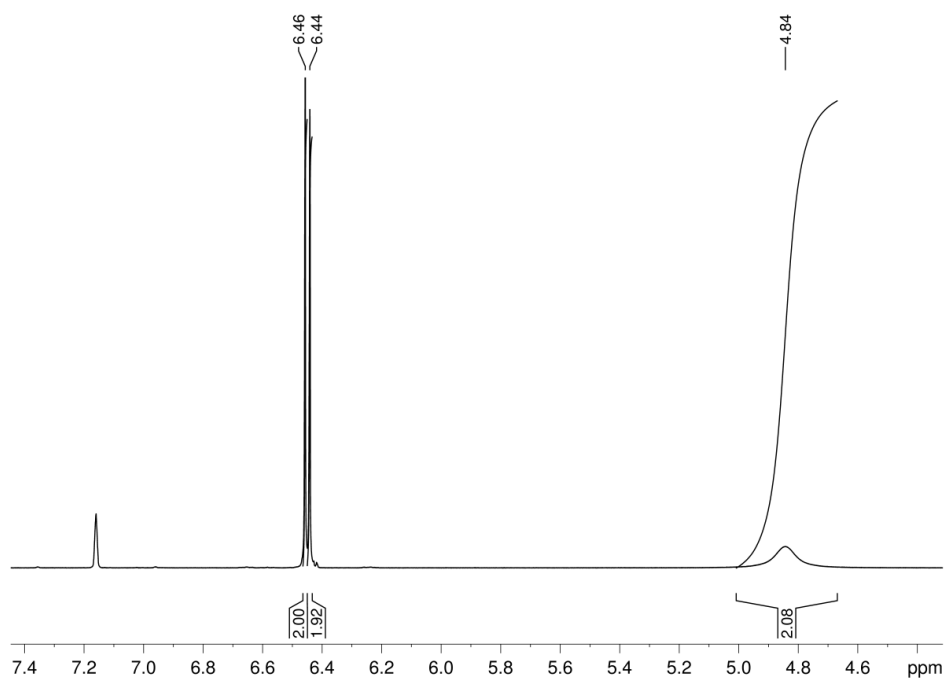

**Figure S3.**  $^1\text{H}$  NMR (400 MHz,  $\text{C}_6\text{D}_6$ ) of **1a**

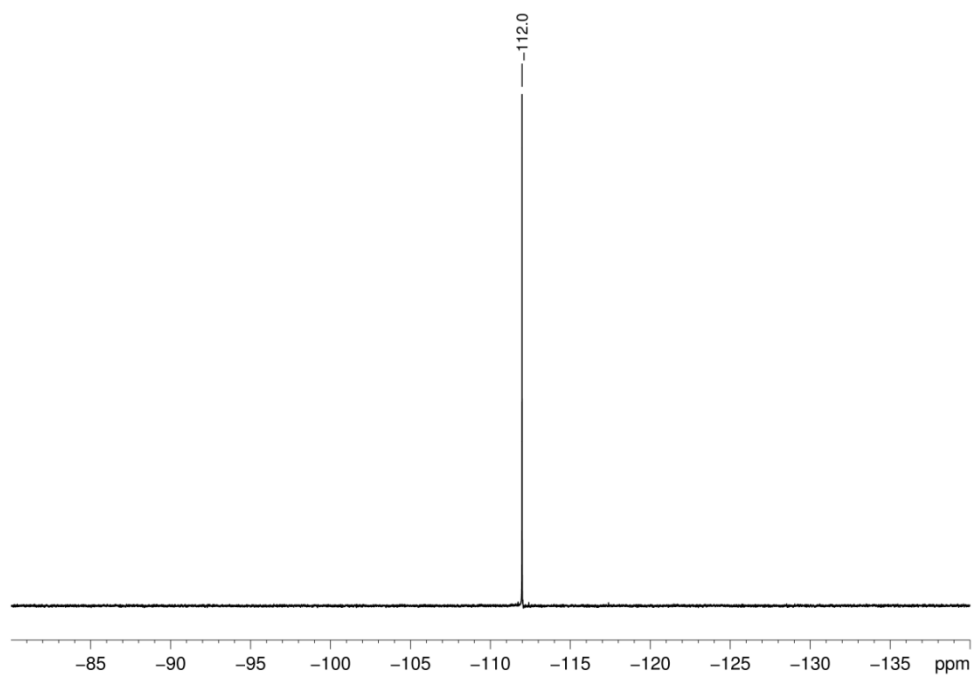

**Figure S4.**  $^{19}\text{F}\{^1\text{H}\}$  (376 MHz,  $\text{C}_6\text{D}_6$ ) of **1a**

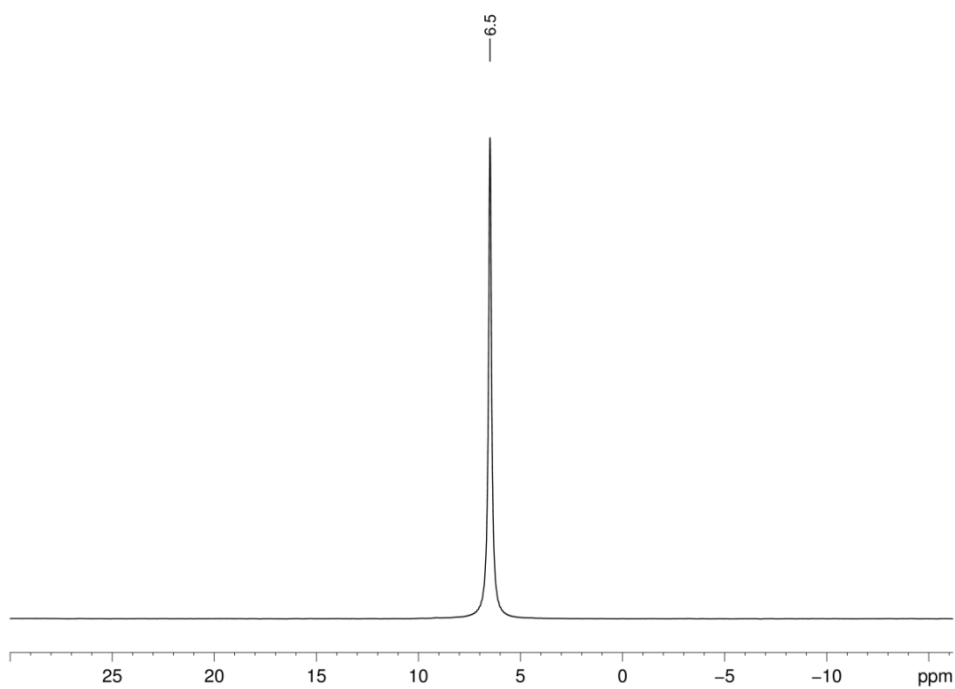

**Figure S5.**  $^{11}\text{B}\{^1\text{H}\}$  (80 MHz, zgbsig,  $\text{C}_6\text{D}_6$ ) of **1a** (with background suppression sequence)

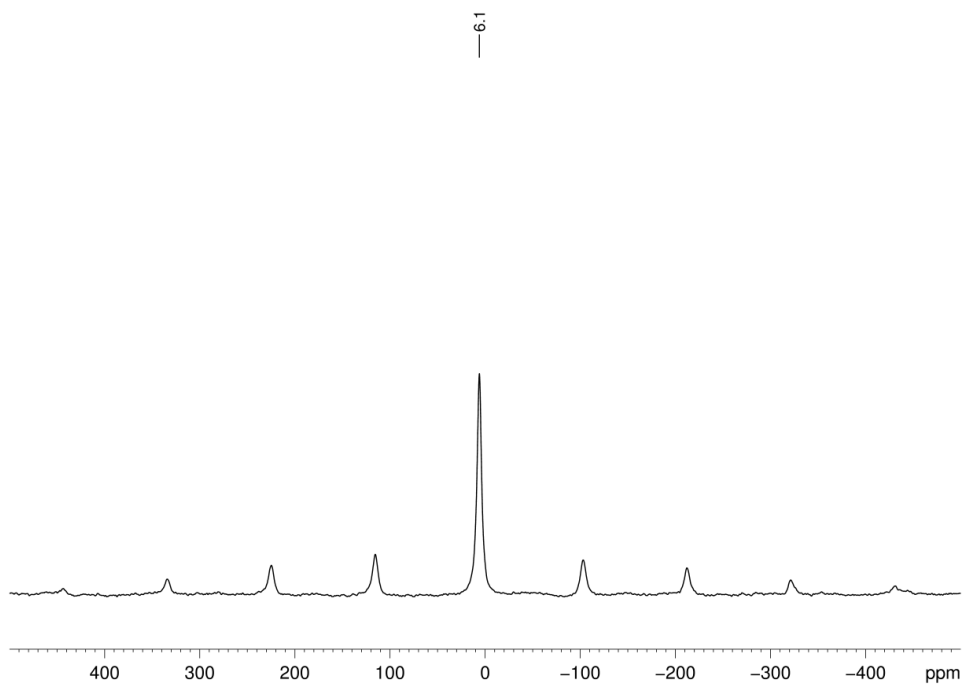

**Figure S6.**  $^{11}\text{B}$  (64 MHz, MAS, Rf 10 kHz) of **1a**

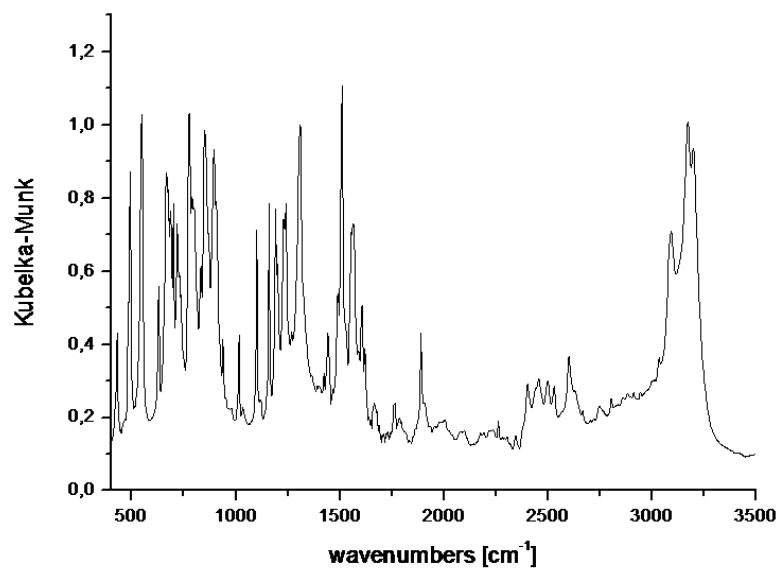

**Figure S7.** DRIFT-IR (KBr) of **1a**

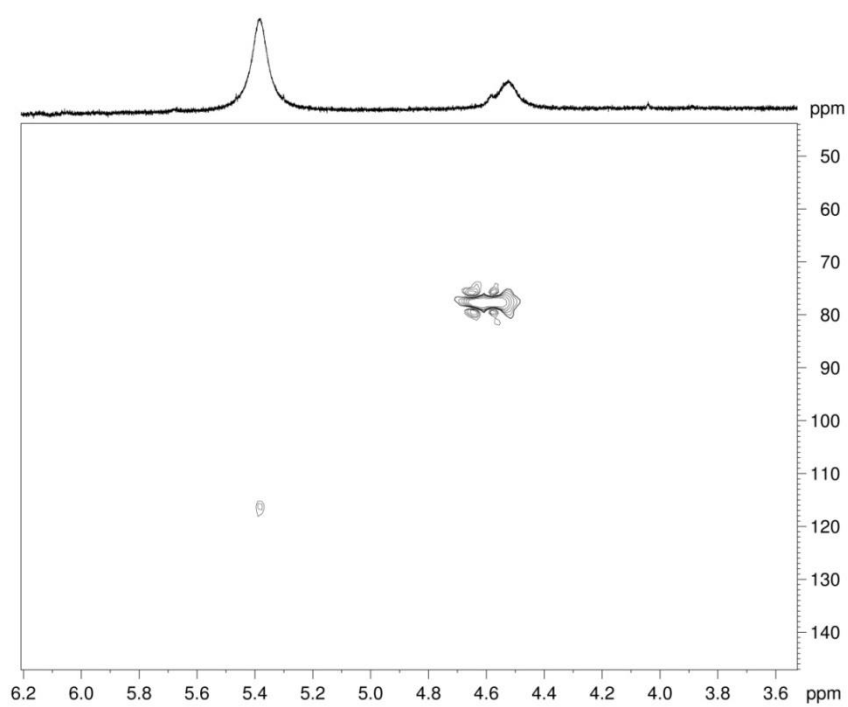

**Figure S8.** <sup>15</sup>N-<sup>1</sup>H-HSQC (189 MHz, C<sub>6</sub>D<sub>6</sub>) of **2a**

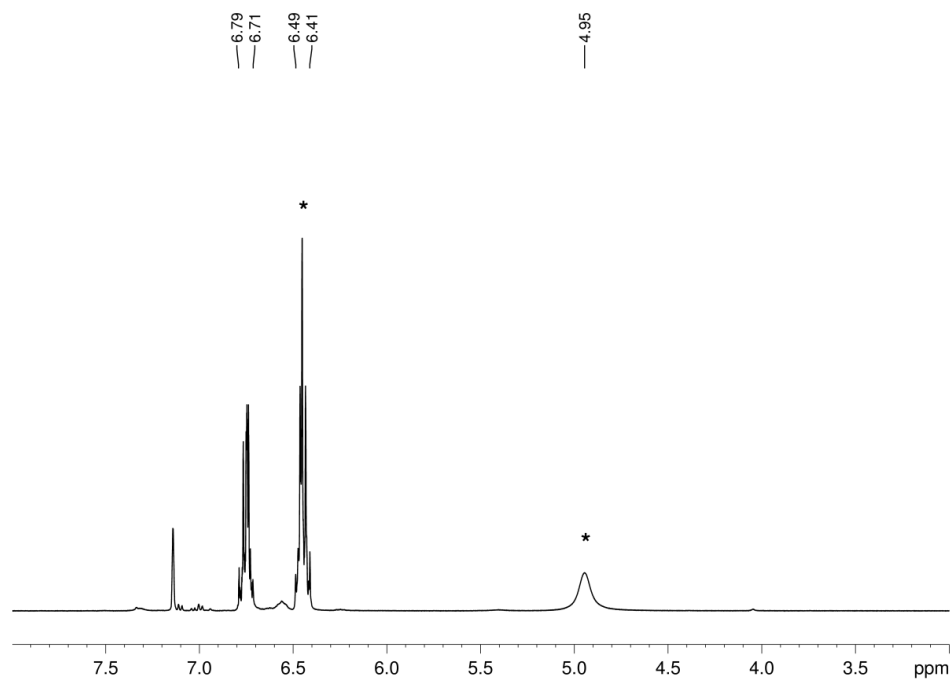

**Figure S9.**  $^1\text{H}$  NMR (400 MHz,  $\text{C}_6\text{D}_6$ ) of **3a** (after 19h at 100 °C without gentle argon passing over the reaction mixture, undecomposed **1a** is marked with \*)

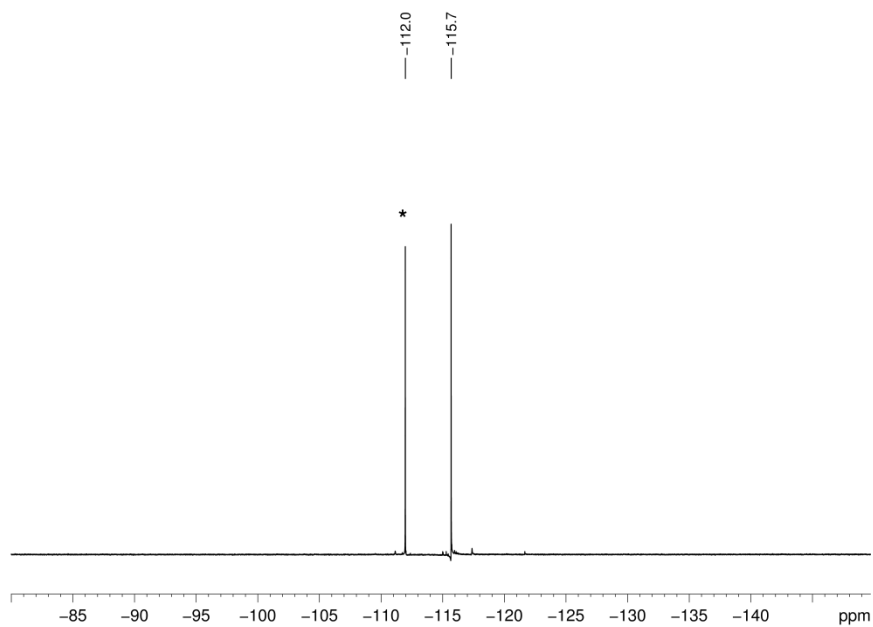

**Figure S10.**  $^{19}\text{F}\{^1\text{H}\}$  NMR (376 MHz,  $\text{C}_6\text{D}_6$ ) of **3a** (after 19h at 100 °C without gentle argon passing over the reaction mixture, undecomposed **1a** is marked with \*)

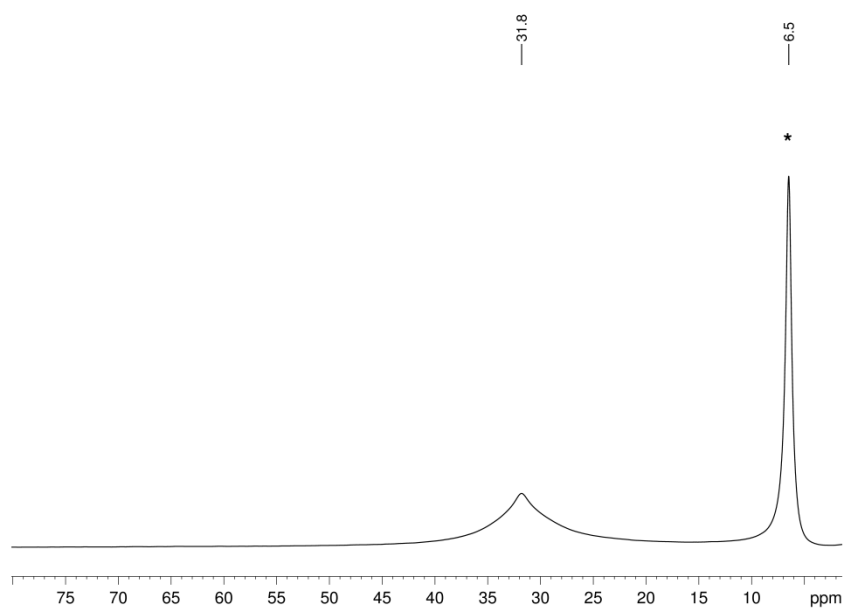

**Figure S11.**  $^{11}\text{B}\{^1\text{H}\}$  (80 MHz, zgbsig,  $\text{C}_6\text{D}_6$ ) of **3a** (after 19h at 100 °C without gentle argon passing over the reaction mixture, undecomposed **1a** is marked with \*)

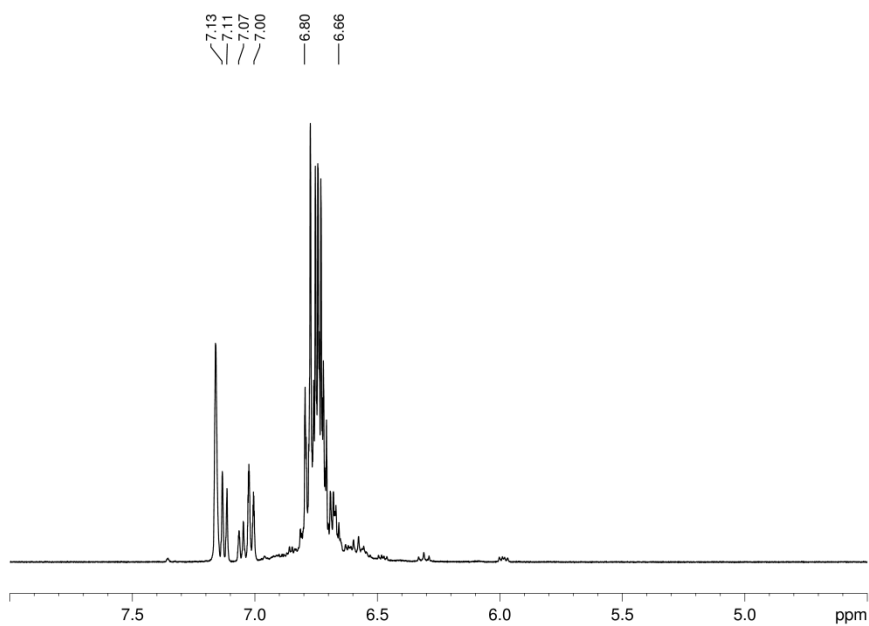

**Figure S12.**  $^1\text{H}$  NMR (400 MHz,  $\text{C}_6\text{D}_6$ ) of **3a** (after 19h at 100 °C with gentle argon passing over the reaction mixture)

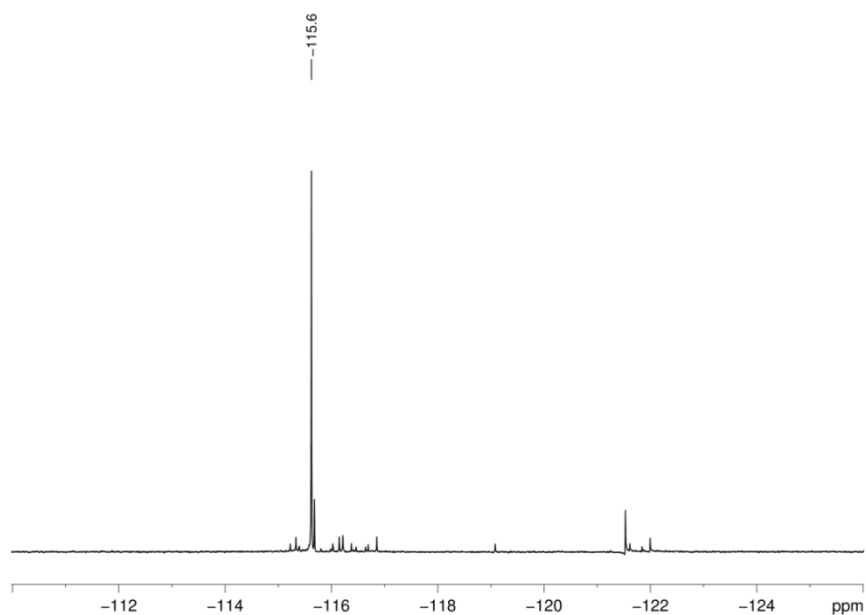

**Figure S13.**  $^{19}\text{F}\{^1\text{H}\}$  (376 MHz,  $\text{C}_6\text{D}_6$ ) of **3a** (after 19h at 100 °C with gentle argon passing over the reaction mixture)

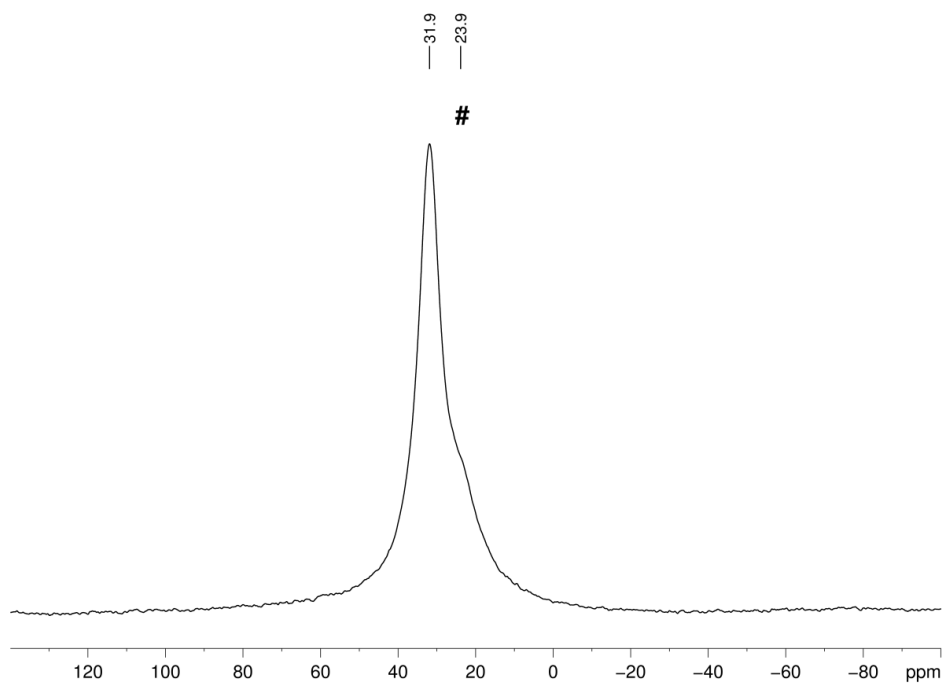

**Figure S14.**  $^{11}\text{B}\{^1\text{H}\}$  (80 MHz, zgbsig,  $\text{C}_6\text{D}_6$ ) of **3a** (with background suppression sequence; after 19h at 100 °C with gentle argon passing over the reaction mixture; partly decomposed **3a** is marked with # )



SPEC: 1008e11.dat (08-OCT-13)  
 Samp:  
 Comp: Mueller MMI 767\_051  
 Oper:  
 Base: 155.16 Study :  
 Peak: 1000.0 mmu Massees: 30.00 > 1000.04  
 Scan 50 @ 1.00 min (EI +Q3MS LMR UP LR) Intensity: 3765395

Electron-Scatter  
 Scans : 1 > 448 131  
 Baseplate  
 Client:  
 #Peaks: 972  
 RIC : 17958808  
 3.8E+06

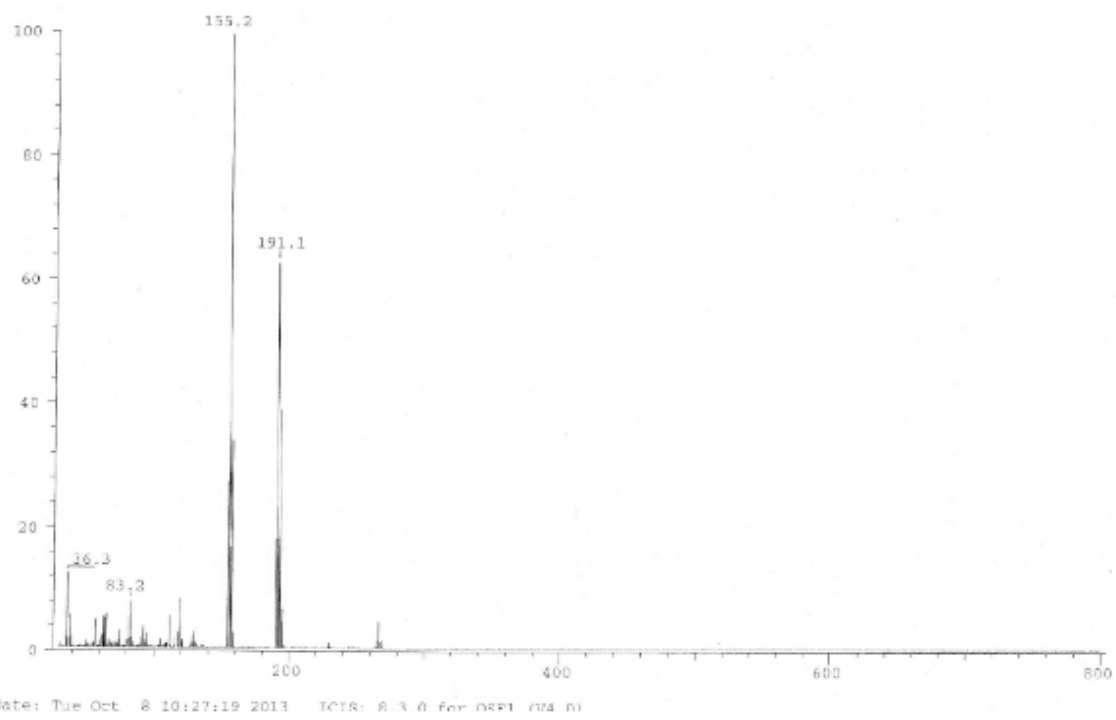

Figure S15. EI-MS (quadrupole, 70 eV) of **3a** (low evaporation temperature)

SPEC: 1009e11.dat (08-OCT-13)  
 Samp:  
 Comp: Mueller MMI 767\_051  
 Oper:  
 Base: 155.13 Study :  
 Peak: 1000.0 mmu Massees: 30.00 > 1000.04  
 Scan 251 @ 4.60 min (EI +Q3MS LMR UP LR) Intensity: 337495

Scans : 1 > 448  
 Client:  
 #Peaks: 978  
 RIC : 3883913  
 3.4E+05

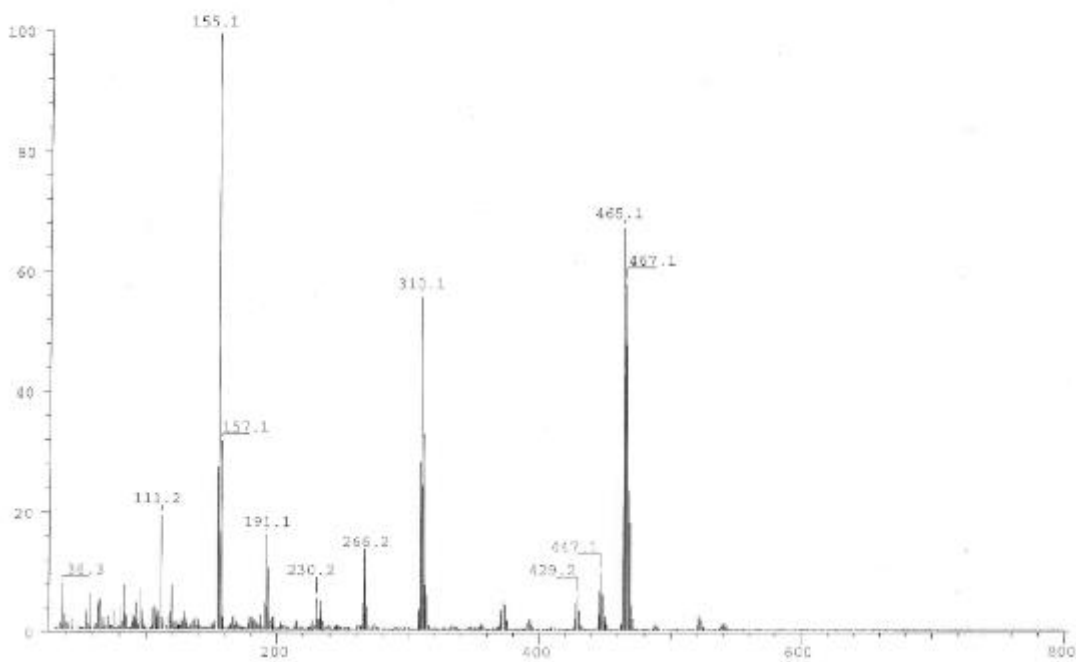

Figure S16. EI-MS (quadrupole, 70 eV) of **3a** (high evaporation temperature)

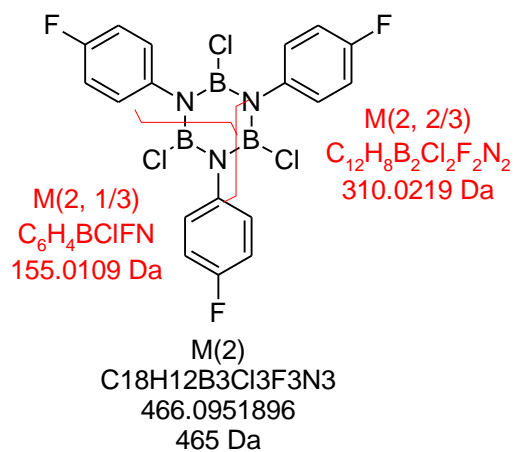

**Figure S17.** Species appearing in the EI-MS spectra of **3a**

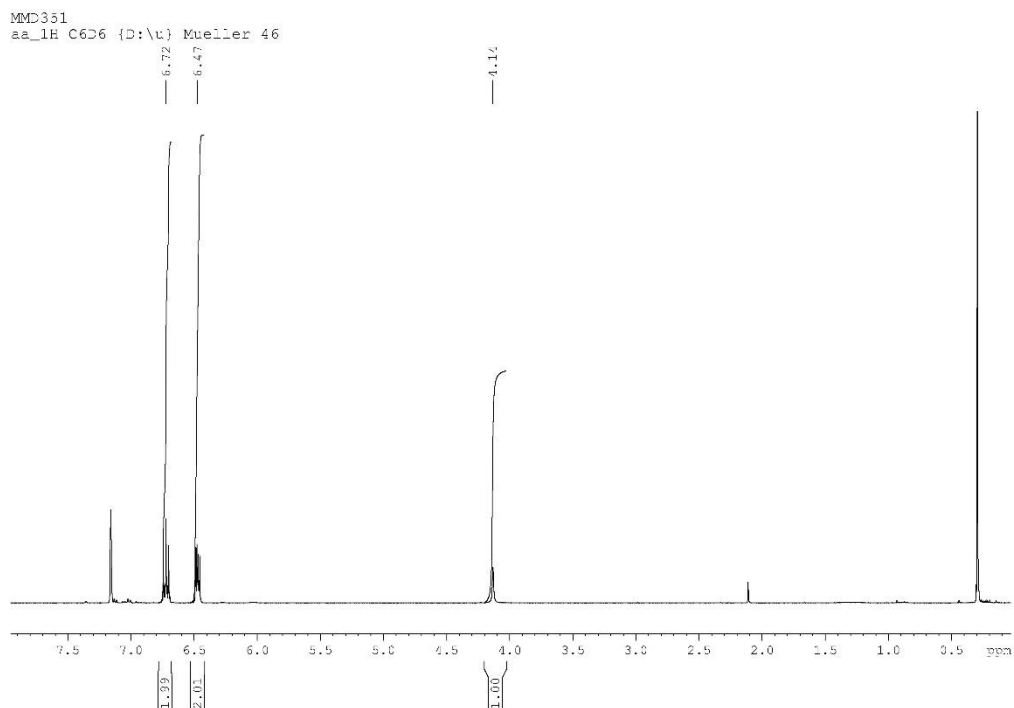

**Figure S18.**  $^1H$  NMR (400 MHz,  $C_6D_6$ ) of **4a**

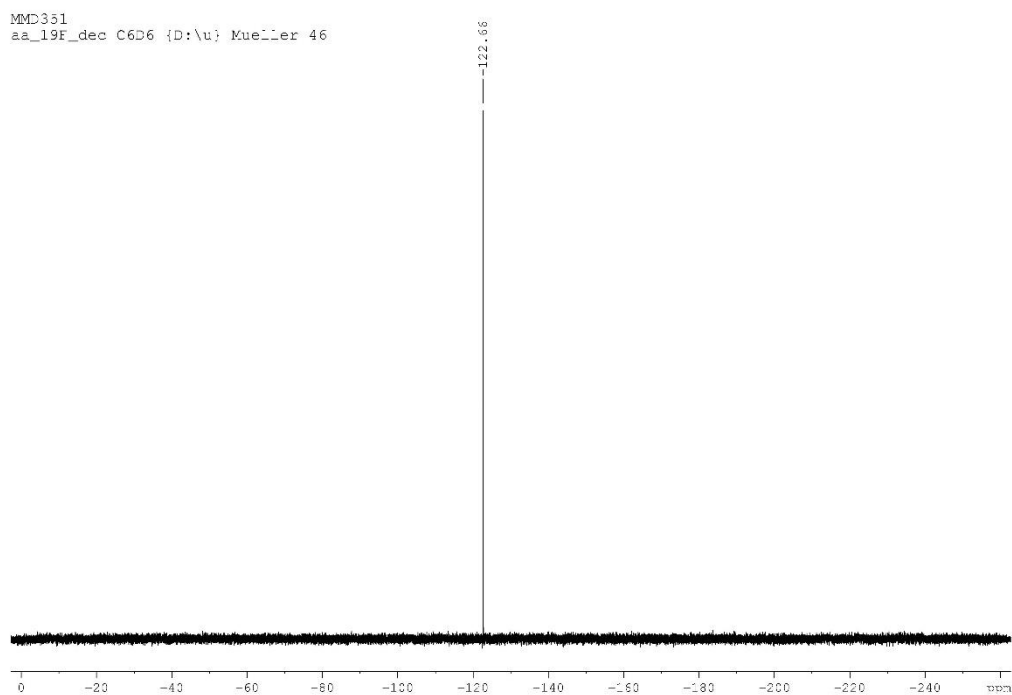

**Figure S19.**  $^{19}\text{F}\{^1\text{H}\}$  NMR (376 MHz,  $\text{C}_6\text{D}_6$ ) of **4a**

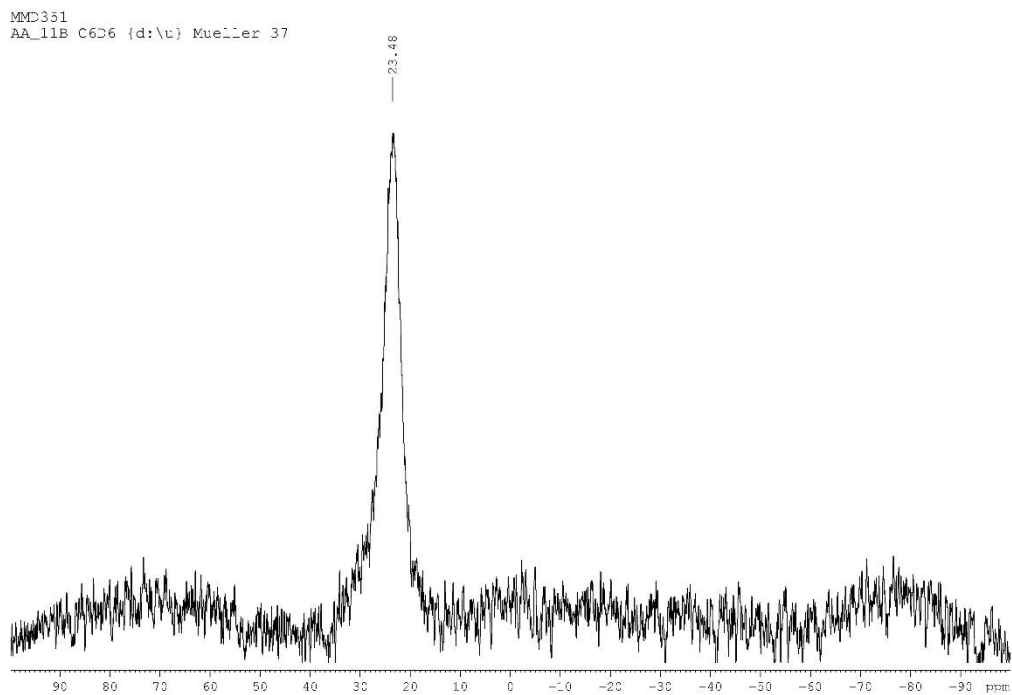

**Figure S20.**  $^{11}\text{B}\{^1\text{H}\}$  NMR (80 MHz,  $\text{C}_6\text{D}_6$ ) of **4a**

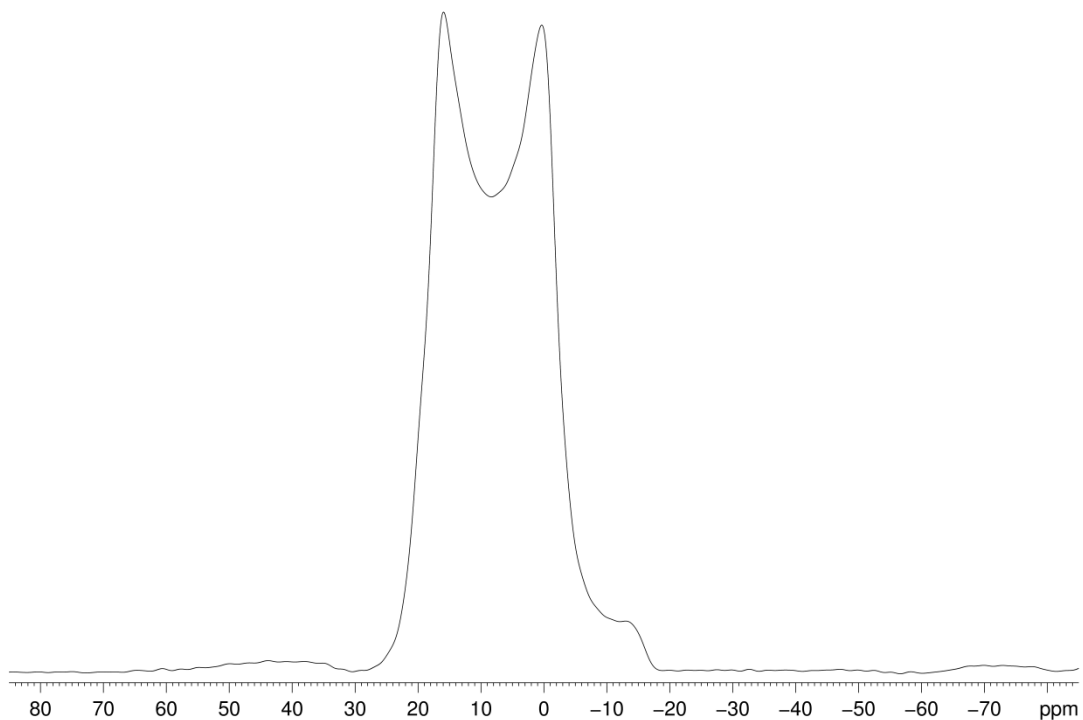

**Figure S21.**  $^{11}\text{B}$  (64 MHz, MAS, Rf 10 kHz) of **4a**.

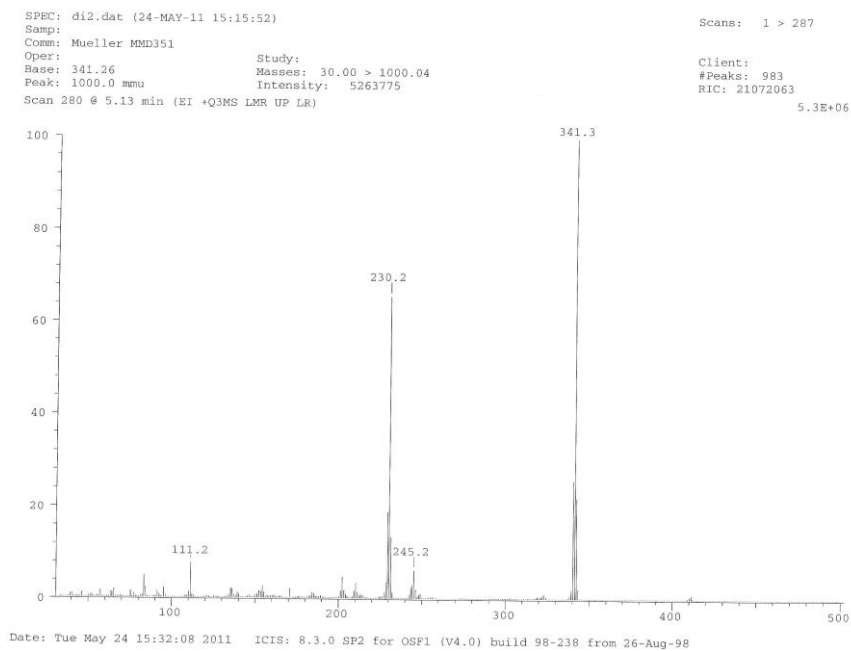

**Figure S22.** EI-MS (quadrupole, 70 eV) of **4a**

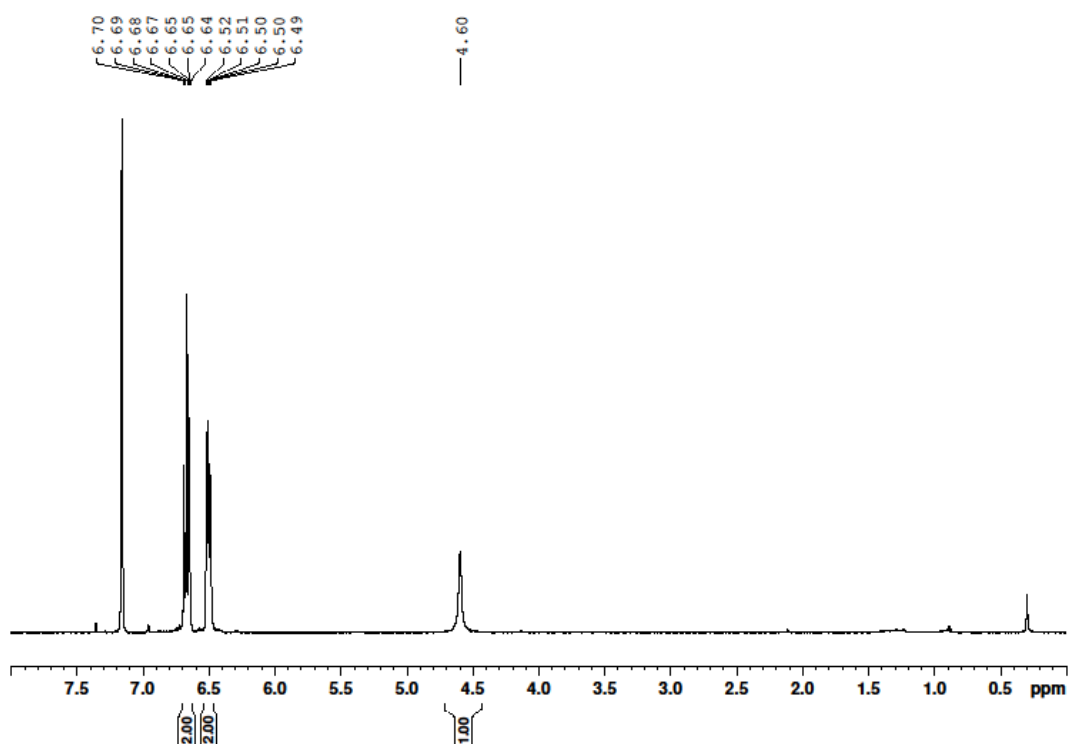

Figure S24.  $^1\text{H}$  NMR (400 MHz,  $\text{C}_6\text{D}_6$ ) of **5a**

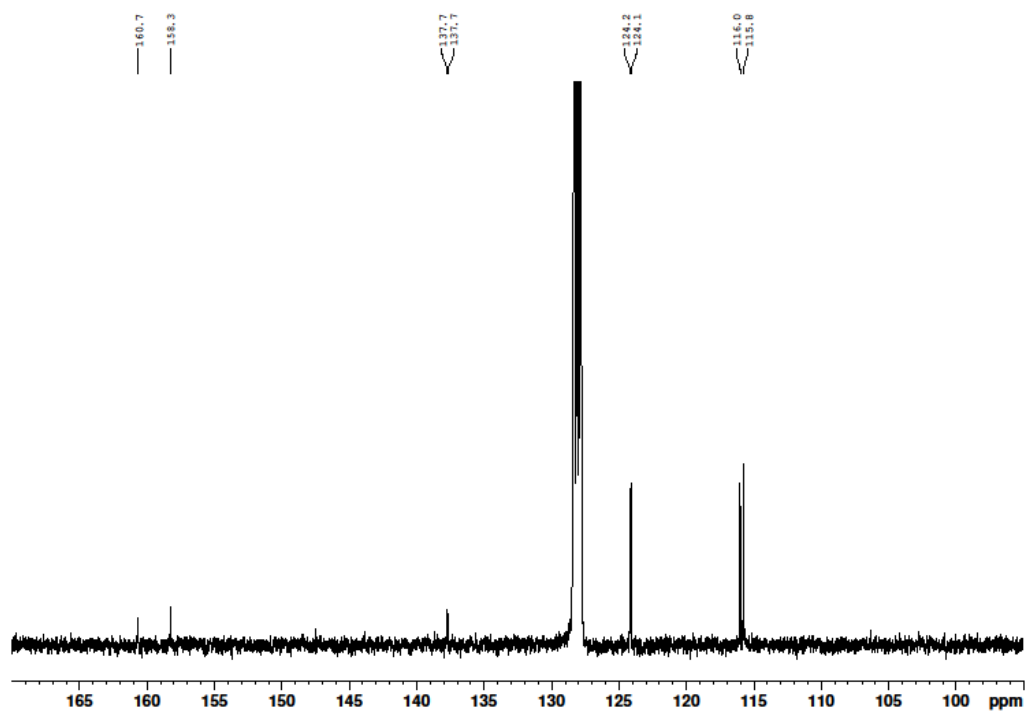

Figure S25.  $^{13}\text{C}$  NMR (100 MHz,  $\text{C}_6\text{D}_6$ ) of **5a**

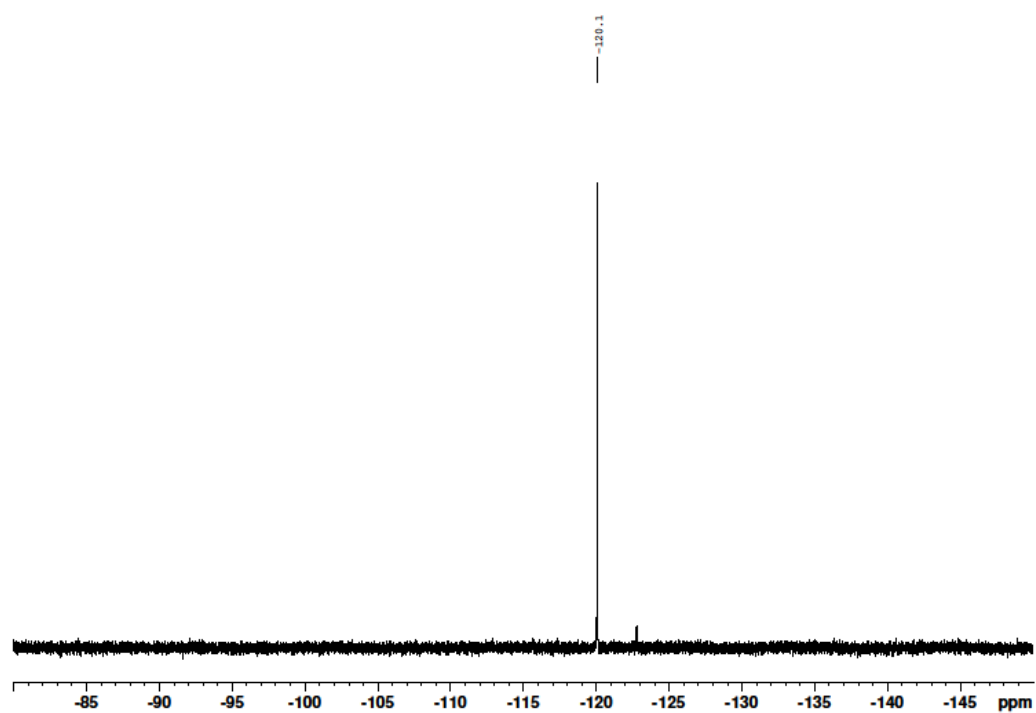

**Figure S26.**  $^{19}\text{F}$  NMR (376 MHz,  $\text{C}_6\text{D}_6$ ) of **5a**

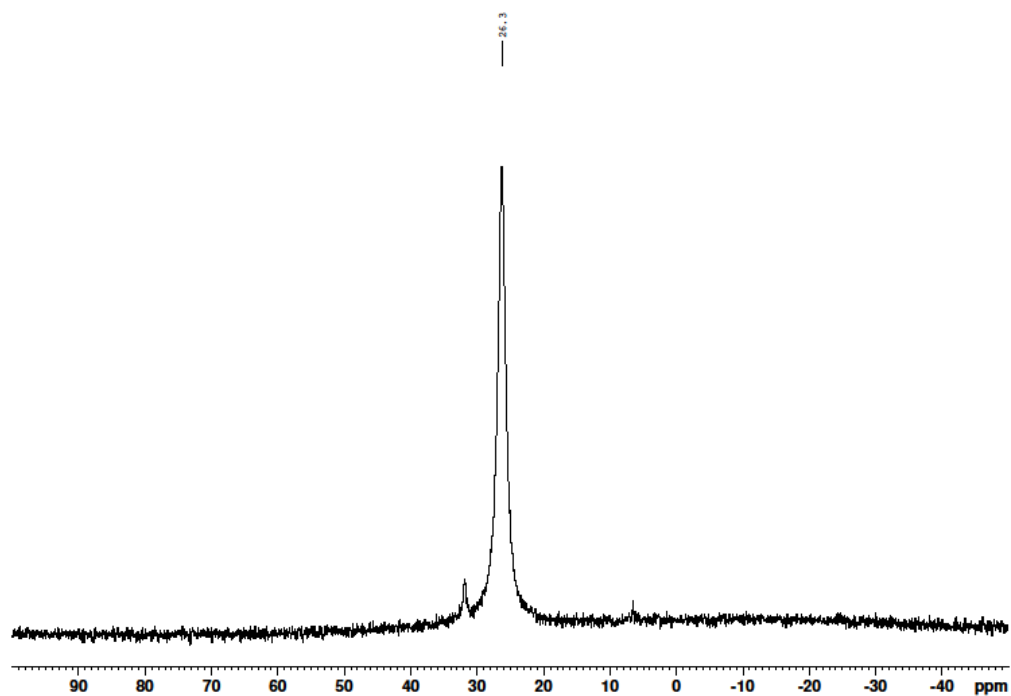

**Figure S27.**  $^{11}\text{B}$  NMR (80 MHz,  $\text{C}_6\text{D}_6$ ) of **5a**

### III. Computational Supplementary Information

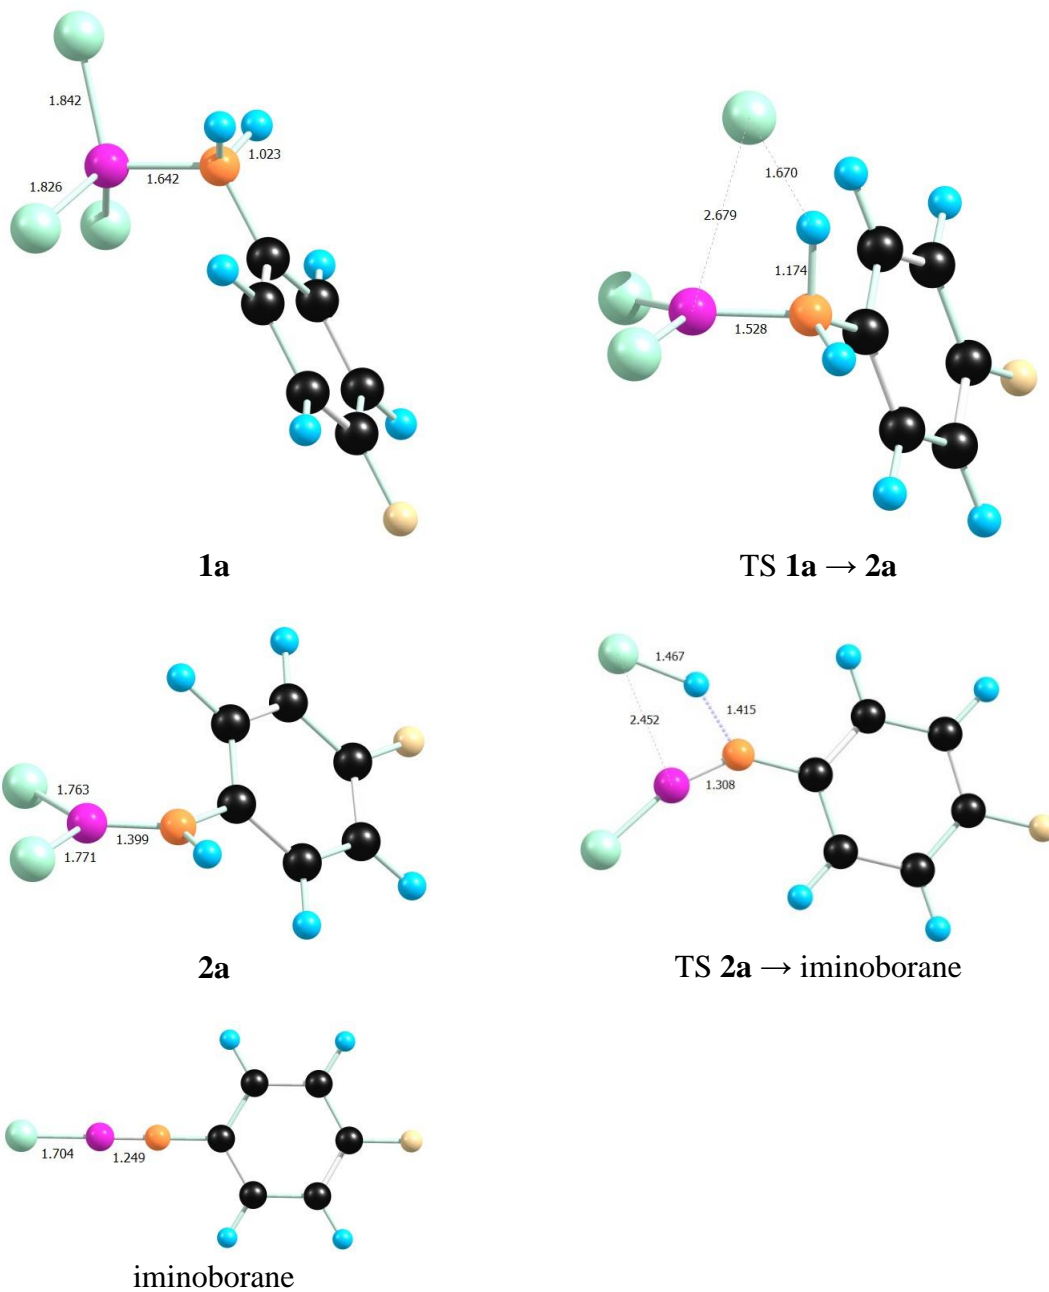

**Figure S28.** Structures computed at the SCS-MP2/cc-pVTZ level of theory for the 1:1 adduct **1a** between 4-fluoroaniline and borontrichloride.

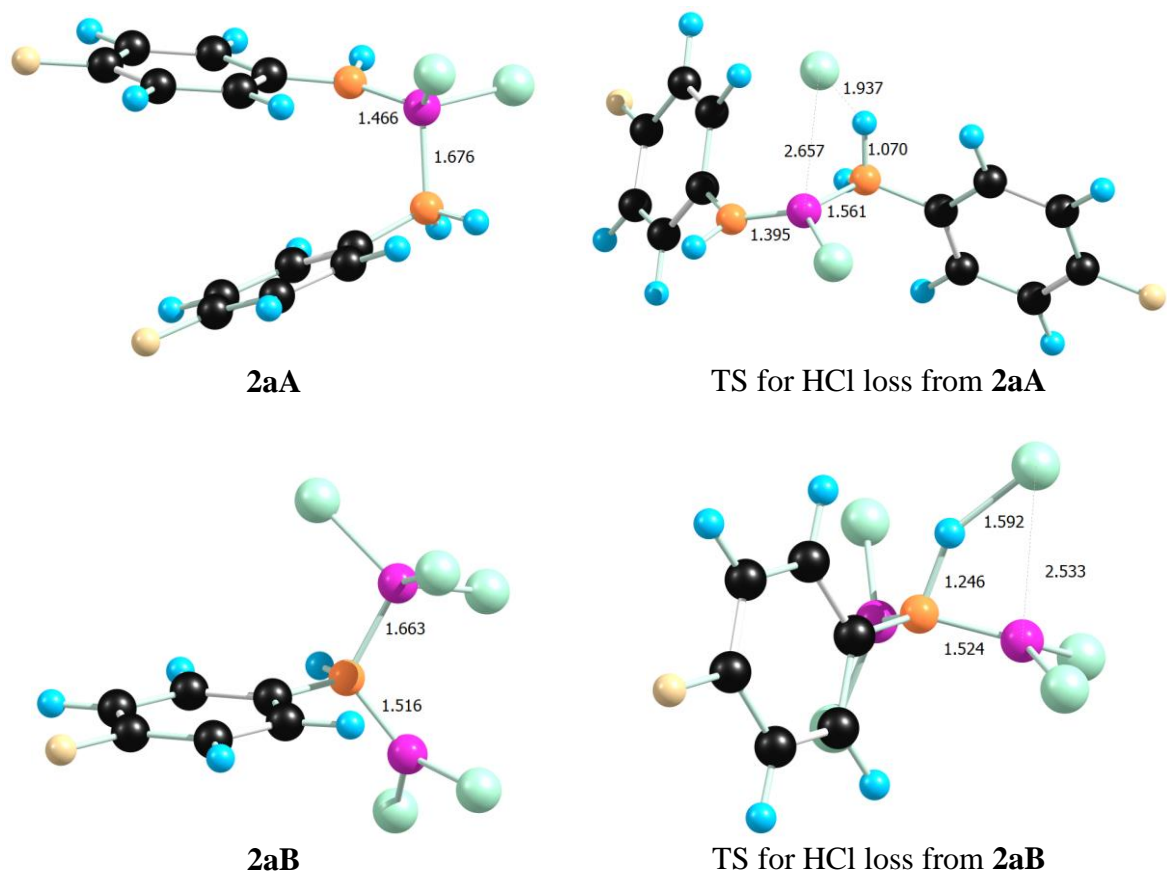

**Figure S29.** Structures computed at the M062X/6-311+G\*\* level of theory for the adducts of **2a** with 4-fluoroaniline (**2aA**) and with trichloroborane (**2aB**) and the transition states for HCl elimination from **2aA** and **2aB**.



## Cartesian Coordinates optimized at the SCS-MP2(fc)/cc-pVTZ level of theory

Unit is Angstrom

18  
4-fluoroaniline-BCl3 adduct, ArNH2BCl3, **1a**

|    |           |           |           |
|----|-----------|-----------|-----------|
| B  | 2.613924  | -0.419278 | 0.000000  |
| Cl | 4.187735  | 0.538619  | 0.000000  |
| Cl | 2.374386  | -1.385835 | 1.529987  |
| Cl | 2.374386  | -1.385835 | -1.529987 |
| C  | -2.560408 | -0.376220 | 0.000000  |
| C  | -1.920626 | -0.192017 | -1.212807 |
| C  | -0.586107 | 0.190027  | -1.210170 |
| C  | 0.066552  | 0.378383  | 0.000000  |
| C  | -0.586107 | 0.190027  | 1.210170  |
| C  | -1.920626 | -0.192017 | 1.212807  |
| F  | -3.848396 | -0.740542 | 0.000000  |
| H  | -2.462505 | -0.350634 | -2.135748 |
| H  | -0.056152 | 0.324451  | -2.145441 |
| H  | -0.056152 | 0.324451  | 2.145441  |
| H  | -2.462505 | -0.350634 | 2.135748  |
| N  | 1.475489  | 0.763767  | 0.000000  |
| H  | 1.681834  | 1.341995  | -0.817803 |
| H  | 1.681834  | 1.341995  | 0.817803  |

18  
TS for HCl loss from **1a**

|    |           |           |           |
|----|-----------|-----------|-----------|
| C  | -0.443262 | 1.071634  | 0.293063  |
| C  | -1.799160 | 1.126090  | 0.604732  |
| C  | -2.605063 | 0.036728  | 0.300310  |
| C  | -2.104126 | -1.107783 | -0.304393 |
| C  | -0.745229 | -1.161979 | -0.608085 |
| C  | 0.070265  | -0.074376 | -0.310033 |
| F  | -3.912885 | 0.092260  | 0.597910  |
| N  | 1.486408  | -0.126220 | -0.630370 |
| B  | 2.516588  | -0.467974 | 0.445606  |
| Cl | 2.053658  | -0.413060 | 2.116445  |
| Cl | 3.951391  | -1.290265 | -0.110042 |
| Cl | 3.027424  | 2.091244  | -0.161078 |
| H  | -2.764792 | -1.932957 | -0.525531 |
| H  | -0.329994 | -2.047559 | -1.071792 |
| H  | 0.211132  | 1.904305  | 0.511600  |
| H  | -2.231366 | 1.998488  | 1.072282  |
| H  | 1.663456  | -0.644083 | -1.487004 |
| H  | 1.955554  | 0.945507  | -0.733619 |

16  
4-fluoroanilinodichloroborane, ArNHBCl2, **2a**

|    |           |           |           |
|----|-----------|-----------|-----------|
| C  | 1.002740  | -0.292721 | -0.428054 |
| C  | 0.929070  | -1.674268 | -0.592168 |
| C  | -0.149762 | -2.359038 | -0.051779 |
| C  | -1.157289 | -1.706998 | 0.644566  |
| C  | -1.083358 | -0.323486 | 0.787156  |
| C  | -0.008308 | 0.389872  | 0.251054  |
| N  | 0.051812  | 1.800195  | 0.436766  |
| B  | 0.283746  | 2.814522  | -0.498450 |
| Cl | 0.573166  | 2.481528  | -2.204884 |
| Cl | 0.259384  | 4.495040  | 0.060607  |
| F  | -0.218061 | -3.694511 | -0.201414 |
| H  | -1.981866 | -2.272538 | 1.053223  |
| H  | -1.869217 | 0.206643  | 1.309059  |
| H  | 1.848895  | 0.251720  | -0.819577 |
| H  | 1.700659  | -2.218213 | -1.117211 |
| H  | -0.181609 | 2.102253  | 1.371106  |

16  
TS for HCl loss from **2a**

|    |           |           |           |
|----|-----------|-----------|-----------|
| N  | -1.207937 | -0.158561 | 1.174047  |
| B  | -1.877200 | -1.078499 | 1.819957  |
| Cl | -2.457735 | -2.573485 | 2.376317  |
| Cl | -3.046735 | 0.745850  | 2.967549  |
| C  | -0.209443 | -0.004745 | 0.203755  |
| H  | -1.995083 | 0.728906  | 1.944537  |
| C  | 0.178848  | 1.285027  | -0.169798 |
| C  | 1.168513  | 1.475247  | -1.131478 |
| C  | 1.760617  | 0.362497  | -1.710581 |
| C  | 1.394938  | -0.930434 | -1.358939 |

|   |           |           |           |
|---|-----------|-----------|-----------|
| C | 0.405312  | -1.110369 | -0.397286 |
| H | -0.297460 | 2.136730  | 0.295914  |
| H | 1.479262  | 2.465598  | -1.430592 |
| F | 2.717148  | 0.539029  | -2.640113 |
| H | 1.879078  | -1.772286 | -1.832206 |
| H | 0.107876  | -2.110505 | -0.111083 |

16

|                                         |           |          |           |
|-----------------------------------------|-----------|----------|-----------|
| B-chloro-N-(4-fluoroanilino)iminoborane |           |          |           |
| N                                       | 0.000000  | 0.000000 | 2.077280  |
| B                                       | 0.000000  | 0.000000 | 3.326189  |
| Cl                                      | 0.000000  | 0.000000 | 5.030350  |
| C                                       | 0.000000  | 0.000000 | -2.072621 |
| C                                       | 1.213204  | 0.000000 | -1.398774 |
| C                                       | 1.208899  | 0.000000 | -0.006423 |
| C                                       | 0.000000  | 0.000000 | 0.700558  |
| C                                       | -1.208899 | 0.000000 | -0.006423 |
| C                                       | -1.213204 | 0.000000 | -1.398774 |
| F                                       | 0.000000  | 0.000000 | -3.419524 |
| H                                       | 2.137405  | 0.000000 | -1.958203 |
| H                                       | 2.140177  | 0.000000 | 0.542330  |
| H                                       | -2.140177 | 0.000000 | 0.542330  |
| H                                       | -2.137405 | 0.000000 | -1.958203 |

40

|                                       |           |           |           |
|---------------------------------------|-----------|-----------|-----------|
| Tri(4-fluoroanilino)borane, <b>4a</b> |           |           |           |
| C                                     | 2.387630  | 0.921486  | 0.041695  |
| C                                     | 3.206652  | 1.726208  | 0.845609  |
| H                                     | 2.750447  | 2.421273  | 1.539161  |
| C                                     | 4.595015  | 1.643023  | 0.770598  |
| H                                     | 5.228459  | 2.264915  | 1.386555  |
| C                                     | 5.164867  | 0.729124  | -0.103681 |
| C                                     | 4.385348  | -0.082083 | -0.914391 |
| H                                     | 4.859820  | -0.769410 | -1.600041 |
| C                                     | 2.996722  | 0.026674  | -0.849751 |
| H                                     | 2.382296  | -0.571264 | -1.507698 |
| C                                     | -1.991845 | 1.607005  | 0.041695  |
| C                                     | -3.098266 | 1.913938  | 0.845609  |
| H                                     | -3.472108 | 1.171320  | 1.539161  |
| C                                     | -3.720407 | 3.157888  | 0.770598  |
| H                                     | -4.575704 | 3.395521  | 1.386555  |
| C                                     | -3.213874 | 4.108344  | -0.103681 |
| C                                     | -2.121588 | 3.838864  | -0.914391 |
| H                                     | -1.763581 | 4.593432  | -1.600041 |
| C                                     | -1.521461 | 2.581900  | -0.849751 |
| H                                     | -0.696419 | 2.348761  | -1.507698 |
| C                                     | -0.395785 | -2.528491 | 0.041695  |
| C                                     | -0.108386 | -3.640146 | 0.845609  |
| H                                     | 0.721661  | -3.592593 | 1.539161  |
| C                                     | -0.874607 | -4.800911 | 0.770598  |
| H                                     | -0.652756 | -5.660436 | 1.386555  |
| C                                     | -1.950994 | -4.837468 | -0.103681 |
| C                                     | -2.263760 | -3.756781 | -0.914391 |
| H                                     | -3.096238 | -3.824022 | -1.600041 |
| C                                     | -1.475260 | -2.608574 | -0.849751 |
| H                                     | -1.685877 | -1.777497 | -1.507698 |
| H                                     | 0.678932  | 1.955562  | 0.416660  |
| H                                     | -2.033033 | -0.389809 | 0.416660  |
| H                                     | 1.354101  | -1.565754 | 0.416660  |
| N                                     | 0.987982  | 1.044794  | 0.114291  |
| N                                     | -1.398809 | 0.333221  | 0.114291  |
| N                                     | 0.410827  | -1.378014 | 0.114291  |
| F                                     | 6.507776  | 0.633082  | -0.172096 |
| F                                     | -3.802153 | 5.319358  | -0.172096 |
| F                                     | -2.705623 | -5.952440 | -0.172096 |
| B                                     | 0.000000  | 0.000000  | 0.099271  |

28

|                                             |           |           |           |
|---------------------------------------------|-----------|-----------|-----------|
| Chloro-di(4-fluoroanilino)borane, <b>5a</b> |           |           |           |
| H                                           | -1.945297 | -3.282666 | 1.488153  |
| H                                           | 0.466326  | -2.724501 | 1.805515  |
| H                                           | 0.443935  | -0.560107 | -1.889671 |
| H                                           | -1.984594 | -1.058244 | -2.162654 |
| H                                           | 2.553725  | -2.017861 | 0.487531  |
| H                                           | 2.553353  | 2.018130  | -0.487187 |
| H                                           | 0.443648  | 0.560844  | 1.890258  |
| H                                           | -1.984911 | 1.058927  | 2.163028  |

|    |           |           |           |
|----|-----------|-----------|-----------|
| H  | -1.945907 | 3.281339  | -1.489006 |
| H  | 0.465825  | 2.723442  | -1.805983 |
| B  | 2.610148  | 0.000192  | 0.000381  |
| C  | -0.064133 | 2.370714  | -0.930376 |
| C  | 0.609399  | 1.590273  | 0.013458  |
| C  | -0.081715 | 1.137676  | 1.142021  |
| C  | -1.436442 | 1.416018  | 1.303378  |
| C  | -2.082030 | 2.182218  | 0.342785  |
| C  | -1.413588 | 2.679592  | -0.766567 |
| C  | 0.609746  | -1.590304 | -0.013299 |
| C  | -0.081389 | -1.137302 | -1.141685 |
| C  | -1.436081 | -1.415729 | -1.303196 |
| C  | -2.081581 | -2.182492 | -0.342994 |
| C  | -1.413075 | -2.680386 | 0.766087  |
| C  | -0.063679 | -2.371360 | 0.930103  |
| N  | 1.971881  | 1.255135  | -0.179124 |
| N  | 1.972131  | -1.254924 | 0.179557  |
| F  | -3.390567 | 2.460712  | 0.497673  |
| F  | -3.390109 | -2.460976 | -0.497975 |
| Cl | 4.404432  | 0.000454  | 0.000930  |

### Cartesian Coordinates optimized at the M062X/6-311+G\*\* level of theory

|     |              |              |              |
|-----|--------------|--------------|--------------|
| 30  |              |              |              |
| 2aA |              |              |              |
| 6   | -0.095142000 | 1.564763000  | -0.160725000 |
| 6   | -0.774850000 | 0.864853000  | 0.844061000  |
| 6   | -2.127040000 | 1.088635000  | 1.076956000  |
| 6   | -2.804268000 | 2.020576000  | 0.315011000  |
| 6   | -2.162570000 | 2.744728000  | -0.672035000 |
| 6   | -0.814213000 | 2.510982000  | -0.904546000 |
| 9   | -4.117985000 | 2.231285000  | 0.538900000  |
| 7   | 1.250102000  | 1.346581000  | -0.485722000 |
| 5   | 2.255782000  | 0.407024000  | 0.019400000  |
| 7   | 2.043149000  | -1.109076000 | -0.663424000 |
| 17  | 3.939996000  | 0.861651000  | -0.637562000 |
| 17  | 2.320773000  | 0.059672000  | 1.843208000  |
| 1   | -2.715133000 | 3.476662000  | -1.247636000 |
| 1   | -0.306176000 | 3.068613000  | -1.684768000 |
| 1   | -0.254281000 | 0.138170000  | 1.450309000  |
| 1   | -2.655344000 | 0.544294000  | 1.850248000  |
| 1   | 1.626895000  | 2.060112000  | -1.092101000 |
| 6   | 0.704451000  | -1.668672000 | -0.562014000 |
| 1   | 2.733946000  | -1.728758000 | -0.237388000 |
| 1   | 2.308010000  | -0.999545000 | -1.643183000 |
| 6   | -0.245474000 | -1.311519000 | -1.509554000 |
| 6   | -1.553908000 | -1.749445000 | -1.366471000 |
| 6   | -1.871734000 | -2.534712000 | -0.271355000 |
| 6   | -0.932865000 | -2.908337000 | 0.674181000  |
| 6   | 0.375705000  | -2.466793000 | 0.524680000  |
| 1   | 0.024713000  | -0.658408000 | -2.331718000 |
| 1   | -2.326175000 | -1.474255000 | -2.072692000 |
| 9   | -3.135910000 | -2.950654000 | -0.121807000 |
| 1   | -1.230816000 | -3.525738000 | 1.511558000  |
| 1   | 1.126093000  | -2.717329000 | 1.265450000  |

|                          |              |              |              |
|--------------------------|--------------|--------------|--------------|
| 30                       |              |              |              |
| TS for HCl loss from 2aA |              |              |              |
| 6                        | -2.382279000 | 0.243091000  | 0.677637000  |
| 6                        | -3.133769000 | -0.610682000 | 1.487573000  |
| 6                        | -4.192129000 | -1.333011000 | 0.954608000  |
| 6                        | -4.469173000 | -1.203301000 | -0.396234000 |
| 6                        | -3.740902000 | -0.366834000 | -1.221212000 |
| 6                        | -2.696960000 | 0.374244000  | -0.675493000 |
| 9                        | -5.483884000 | -1.911096000 | -0.916668000 |
| 7                        | -1.299619000 | 0.972685000  | 1.247871000  |
| 5                        | 0.001812000  | 1.084164000  | 0.757434000  |
| 7                        | 0.433337000  | 0.063143000  | -0.342087000 |

|    |              |              |              |
|----|--------------|--------------|--------------|
| 17 | -0.034876000 | 2.609696000  | -1.418257000 |
| 17 | 1.256895000  | 1.881552000  | 1.699071000  |
| 1  | -4.006828000 | -0.280119000 | -2.267070000 |
| 1  | -2.145065000 | 1.085867000  | -1.282492000 |
| 1  | -2.883273000 | -0.706498000 | 2.537936000  |
| 1  | -4.793869000 | -1.995672000 | 1.563527000  |
| 1  | -1.534204000 | 1.525446000  | 2.061525000  |
| 6  | 1.795197000  | -0.458918000 | -0.308805000 |
| 1  | 0.303957000  | 0.717967000  | -1.177916000 |
| 1  | -0.252948000 | -0.692092000 | -0.408129000 |
| 6  | 2.051184000  | -1.669256000 | 0.316229000  |
| 6  | 3.352322000  | -2.155717000 | 0.352659000  |
| 6  | 4.353916000  | -1.404493000 | -0.236005000 |
| 6  | 4.108824000  | -0.190733000 | -0.855998000 |
| 6  | 2.807461000  | 0.290719000  | -0.893473000 |
| 1  | 1.246627000  | -2.231428000 | 0.777788000  |
| 1  | 3.595040000  | -3.097024000 | 0.827742000  |
| 9  | 5.609222000  | -1.871423000 | -0.203909000 |
| 1  | 4.928276000  | 0.359759000  | -1.299498000 |
| 1  | 2.572700000  | 1.242986000  | -1.358613000 |

20  
2aB

|    |              |              |              |
|----|--------------|--------------|--------------|
| 6  | 1.589185000  | 0.291679000  | 1.006753000  |
| 6  | 2.970185000  | 0.285226000  | 1.152762000  |
| 6  | 3.763597000  | 0.113645000  | 0.032752000  |
| 6  | 3.231760000  | -0.052440000 | -1.233750000 |
| 6  | 1.851898000  | -0.040636000 | -1.376191000 |
| 6  | 1.041226000  | 0.133230000  | -0.260640000 |
| 7  | -0.417783000 | 0.127412000  | -0.469513000 |
| 5  | -1.096799000 | 1.430460000  | -0.096025000 |
| 17 | -1.327242000 | 1.900057000  | 1.547991000  |
| 17 | -1.501870000 | 2.505513000  | -1.403281000 |
| 9  | 5.093768000  | 0.106431000  | 0.178919000  |
| 1  | 3.889820000  | -0.192834000 | -2.080963000 |
| 1  | 1.410029000  | -0.184124000 | -2.356464000 |
| 1  | 0.954734000  | 0.400142000  | 1.874017000  |
| 1  | 3.432686000  | 0.403306000  | 2.123989000  |
| 1  | -0.546319000 | 0.048028000  | -1.482869000 |
| 5  | -1.254855000 | -1.225829000 | 0.015268000  |
| 17 | -0.973051000 | -1.585112000 | 1.770146000  |
| 17 | -3.002981000 | -0.722695000 | -0.341820000 |
| 17 | -0.664810000 | -2.552566000 | -1.098196000 |

20  
TS for HCl loss from 2aB

|    |              |              |              |
|----|--------------|--------------|--------------|
| 6  | -1.715471000 | 0.093643000  | -1.095126000 |
| 6  | -3.101879000 | 0.089003000  | -1.087593000 |
| 6  | -3.759262000 | 0.045144000  | 0.131687000  |
| 6  | -3.087473000 | 0.006851000  | 1.339274000  |
| 6  | -1.697620000 | 0.011643000  | 1.325019000  |
| 6  | -1.023263000 | 0.053601000  | 0.1111005000 |
| 7  | 0.438925000  | 0.070870000  | 0.135916000  |
| 5  | 1.014680000  | 1.442670000  | 0.044857000  |
| 17 | 0.732687000  | 2.416856000  | -1.371390000 |
| 17 | 1.910067000  | 2.077325000  | 1.386994000  |
| 9  | -5.098135000 | 0.038852000  | 0.137509000  |
| 1  | -3.646520000 | -0.031691000 | 2.264937000  |
| 1  | -1.139566000 | -0.032807000 | 2.253744000  |
| 1  | -1.173519000 | 0.124400000  | -2.032475000 |
| 1  | -3.675904000 | 0.115193000  | -2.004620000 |
| 1  | 0.817240000  | -0.477516000 | 1.189415000  |
| 5  | 1.227365000  | -1.052323000 | -0.527671000 |
| 17 | 0.390663000  | -2.426244000 | -1.198941000 |
| 17 | 2.851359000  | -0.633008000 | -1.057266000 |
| 17 | 1.569847000  | -1.687540000 | 1.899925000  |

16  
2a

|   |             |              |              |
|---|-------------|--------------|--------------|
| 6 | 0.961994000 | 0.637665000  | 0.776690000  |
| 6 | 2.315163000 | 0.932622000  | 0.671054000  |
| 6 | 3.141282000 | 0.044230000  | 0.006915000  |
| 6 | 2.663484000 | -1.124618000 | -0.557284000 |
| 6 | 1.305837000 | -1.400971000 | -0.461801000 |
| 6 | 0.450698000 | -0.522990000 | 0.201050000  |

|    |              |              |              |
|----|--------------|--------------|--------------|
| 7  | -0.933784000 | -0.843013000 | 0.303500000  |
| 5  | -2.042551000 | -0.051706000 | 0.010232000  |
| 17 | -1.899676000 | 1.604433000  | -0.576468000 |
| 17 | -3.659643000 | -0.745096000 | 0.212874000  |
| 9  | 4.451575000  | 0.323638000  | -0.090595000 |
| 1  | 3.345707000  | -1.792316000 | -1.067357000 |
| 1  | 0.902960000  | -2.300208000 | -0.913589000 |
| 1  | 0.301308000  | 1.306872000  | 1.312370000  |
| 1  | 2.734339000  | 1.830888000  | 1.105730000  |
| 1  | -1.121580000 | -1.802720000 | 0.563913000  |

14

4-fluoroanilinie

|   |              |              |              |
|---|--------------|--------------|--------------|
| 6 | 1.375284000  | 0.000007000  | -0.007680000 |
| 6 | 0.662529000  | 1.202625000  | -0.007127000 |
| 6 | -0.726478000 | 1.206549000  | -0.000807000 |
| 6 | -1.400619000 | 0.000015000  | 0.002655000  |
| 6 | -0.726470000 | -1.206548000 | -0.000793000 |
| 6 | 0.662504000  | -1.202632000 | -0.007285000 |
| 1 | 1.201569000  | 2.143535000  | -0.017161000 |
| 1 | -1.287922000 | 2.132356000  | 0.001080000  |
| 9 | -2.749742000 | 0.000001000  | 0.010325000  |
| 1 | -1.287934000 | -2.132343000 | 0.001064000  |
| 1 | 1.201589000  | -2.143510000 | -0.017642000 |
| 7 | 2.773476000  | -0.000158000 | -0.072908000 |
| 1 | 3.212779000  | 0.834171000  | 0.286683000  |
| 1 | 3.212765000  | -0.833220000 | 0.289632000  |

4

trichloroborane

|    |              |              |             |
|----|--------------|--------------|-------------|
| 5  | 0.000000000  | 0.000000000  | 0.000000000 |
| 17 | 0.000000000  | 1.742600000  | 0.000000000 |
| 17 | 1.509136000  | -0.871300000 | 0.000000000 |
| 17 | -1.509136000 | -0.871300000 | 0.000000000 |
